## Correction

# Correction: The White Ceiling Heuristic and the Underestimation of Asian-American Income

The PLOS ONE Staff

There are errors in Table 1. Each value in the second and third columns between rows 1 and 17 should be shifted down by one row. Please see the corrected Table 1 here.

**Table 1. Participant Demographics.**

|                      | Study 1       | Study 2           |
|----------------------|---------------|-------------------|
| <b>Age</b>           |               |                   |
| Range                | 18–67         | 18–73             |
| Median               | 27.5          | 29                |
| Mean                 | 31            | 32.8              |
| <b>Gender</b>        |               |                   |
| Male                 | 64%           | 53%               |
| Female               | 35%           | 46%               |
| <b>Income</b>        |               |                   |
| Range                | \$0–\$200,000 | \$1,000–\$600,000 |
| Median               | \$45,000      | \$43,000          |
| Mean                 | \$51,888      | \$56,722          |
| <b>Ethnicity</b>     |               |                   |
| Black                | 4.9%          | 4.1%              |
| White                | 79.9%         | 80.9%             |
| East Asian           | 6.6%          | 5.5%              |
| Hispanic             | 4.2%          | 2.3%              |
| Biracial/Multiracial | 1.7%          | 3.2%              |
| <b>Education</b>     |               |                   |
| High School or Less  | 8.7%          | 12.7%             |
| Some College         | 39.9%         | 31.8%             |
| College Degree       | 39.6%         | 44.5%             |
| Masters Degree       | 8.7%          | 7.7%              |
| Doctoral Degree      | 2.4%          | 3.2%              |
| N                    | 286           | 213               |

Note. Demographic data were not collected in Study 3.  
doi:10.1371/journal.pone.0108732.t001

## Reference

- Martin CC, Nezek JB (2014) The White Ceiling Heuristic and the Underestimation of Asian-American Income. PLoS ONE 9(9): e108732. doi:10.1371/journal.pone.0108732.

**Citation:** The PLOS ONE Staff (2014) Correction: The White Ceiling Heuristic and the Underestimation of Asian-American Income. PLoS ONE 9(12): e116228. doi:10.1371/journal.pone.0116228

**Published:** December 17, 2014

**Copyright:** © 2014 The PLOS ONE Staff. This is an open-access article distributed under the terms of the Creative Commons Attribution License, which permits unrestricted use, distribution, and reproduction in any medium, provided the original author and source are credited.
